# Supplementary material
Source: Springer Nature journal article supplement (https://www.springermedizin.de/resource/supplementary/12889_2014_7479_MOESM3_ESM.pdf/9497364)

**A**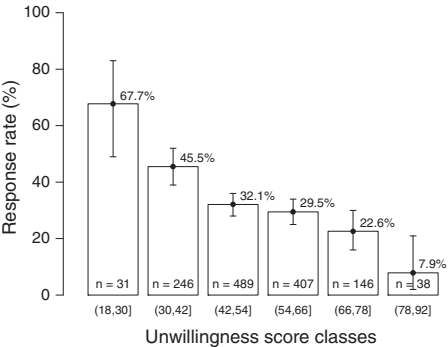**B**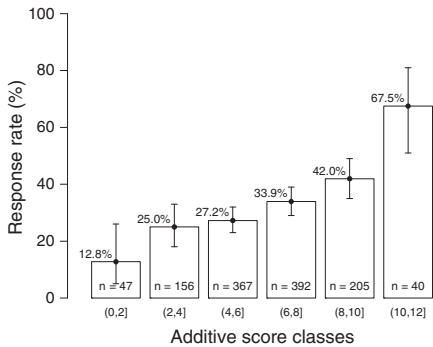

Supplement: MOESM3 [file 9497364]
